# Supplementary material for: N-doped Fe2(MoO4)3-decorated MoO3 nanorods via metal–organic framework-involved synthesis as a bifunctional nanoreactor for capturing and catalyzing polysulfides in lithium–sulfur batteries
Source: Royal Society of Chemistry journal article supplement (doi:10.1039/d2nj03894c), 2022-01-01
Supplement: d2nj03894c1.pdf [file d2nj03894c1.pdf]

## ***Supporting Information***

### **N-doped Fe<sub>2</sub>(MoO<sub>4</sub>)<sub>3</sub>-decorated MoO<sub>3</sub> nanorods via metal-organic framework-involved synthesis as a bifunctional nanoreactor for capturing and catalyzing polysulfides in lithium-sulfur batteries**

Zhi Hang Liu, Xiaoqing Mao, Xihao Liu, Yuanyan Luo, and Pei Kang Shen \*

*State Key Laboratory of Processing for Nonferrous Metals and Featured Materials; Guangxi Key Laboratory of Electrochemical Energy Materials; Collaborative Innovation Center of Sustainable Energy Materials, School of Physical Science and Technology, Guangxi University, Nanning 530004, China*

\*Corresponding authors: Prof. Pei Kang Shen ([pkshen@gxu.edu.cn](mailto:pkshen@gxu.edu.cn))

## **1. Experimental section**

### **Materials Synthesis**

In brief, 0.6 g of  $(\text{NH}_4)_6\text{Mo}_7\text{O}_{24}\cdot 4\text{H}_2\text{O}$  and 2.5 mL of concentrated hydrochloric acid were added to 36 mL of deionized water. Then, the above solution was transferred to an autoclave and kept at 160 °C for 15 h.  $\text{MoO}_3$  nanobelts were obtained after drying at 70 °C in the oven.

100 mg of the  $\text{MoO}_3$  nanobelts, 1.12 g of  $\text{Fe}_2\text{SO}_4\cdot 6\text{H}_2\text{O}$ , and 2.4 g of polyvinylpyrrolidone were dispersed into 40 mL methanol to acquire solution A. 1.31 g of 2-methylimidazole was dissolved in 40 mL methanol to get solution B. Solution B was slowly dropped into solution A under magnetic stirring. After 2 h, the  $\text{MoO}_3/\text{Fe-ZIF}$  was collected by centrifugation and rinsed with ethanol. The  $\text{N-MoO}_3@\text{Fe}_2(\text{MoO}_4)_3$  hybrid nanorods were gained by  $\text{MoO}_3/\text{Fe-ZIF}$  calcined at 500 °C for 2 h in a flow of air.

### **Materials Characterization**

The morphology and structural characteristics of the fabricated samples were tested on Hitachi SU8220 scanning electron microscope (SEM) and Titan G2 transmission electron microscope (TEM) with energy dispersive X-Ray (EDX) spectroscopy. X-Ray Diffraction (XRD) results were recorded by a Rigaku D/Max-III diffractometer. Thermo Fisher Scientific ESCALAB 250XI+ photoelectron spectrometer with the  $\text{Al K}\alpha$  as the radiation source was used for XPS.

### **Preparation of coin cells and electrochemical measurement**

To prepare a pure sulfur cathode, we used the standard sulfur cathode synthesis process: Ketjen black (KB) and sulfur were mixed with the polyvinylidene fluoride (PVDF) (mass ratio of 2:7:1) before adding moderate methyl-2-pyrrolidinone (NMP) for a slurry. The slurry was

coated onto an aluminum foil and dried immediately. The sulfur loading was about  $1.2 \text{ mg cm}^{-2}$ . The coating slurry is made by  $\text{N-MoO}_3@\text{Fe}_2(\text{MoO}_4)_3$ , KB, and PVDF (mass ratio of 7:2:1). The coated substrate is Cegard 2500 separator and the thickness is about  $25 \text{ }\mu\text{m}$ . The diameter of the cut circular separator was 18 mm. The thickness of the coating is about  $10 \text{ }\mu\text{m}$ , and the loading of such coating is about  $0.20 \text{ mg cm}^{-2}$ . Coin cells (CR2032) with a KB/S cathode (diameter of 14 mm), the functional separator ( $\text{N-MoO}_3@\text{Fe}_2(\text{MoO}_4)_3/\text{PP}$ ), the lithium pieces anode, and the electrolyte (1 M LiTFSI in DOL/DME (volume ratio of 1:1) with 2 wt%  $\text{LiNO}_3$ ) were assembled in an argon-filled glovebox. The galvanostatic charge-discharge measurements were tested on a Neware CT-4008T battery test system. The CV and EIS measurements were acquired on a Donghua DH7000 electrochemical workstation. The voltage window of the CV tests was 1.7-2.8 V and the frequency range of EIS tests was 0.01 Hz to 100 kHz.

### **Adsorption Test of LiPSs**

To prepare 0.2 M  $\text{Li}_2\text{S}_6$  solution, sulfur powder and  $\text{Li}_2\text{S}$  (molar ratio of 5:1) were added to the DOL/DME solution. After stirring at  $50 \text{ }^\circ\text{C}$  for 12 h, 10 mg of  $\text{N-MoO}_3@\text{Fe}_2(\text{MoO}_4)_3$ , was added separately into glass bottles containing 0.15 mL of  $\text{Li}_2\text{S}_6$  solution diluted in another 3.0 mL of DOL/DME solution. After 9 hours, the difference in color can be identified by eye observation. The adsorption capacity of  $\text{N-MoO}_3@\text{Fe}_2(\text{MoO}_4)_3$  was further confirmed via UV-vis spectra tested by HORIBA FluoroMax-4 fluorescence spectrometer.

### **Permeation Tests of $\text{Li}_2\text{S}_6$**

$\text{N-MoO}_3@\text{Fe}_2(\text{MoO}_4)_3/\text{PP}$  was used to separate the H-type glass electrolysis cells. 0.01 M prepared  $\text{Li}_2\text{S}_6$  solution is on the left, and the  $\text{Li}_2\text{S}_6$ -free DOL/DME solution was on the other side. The color change was recorded after 6 hours to compare the permeation of LiPSs.

## Assembly of Symmetric Cells and Tests

Sample (N-MoO<sub>3</sub>@Fe<sub>2</sub>(MoO<sub>4</sub>)<sub>3</sub> or MoO<sub>3</sub>), carbon black, and PVDF (mass ratio 7:2:1) were mixed in NMP to prepare a uniform slurry. The slurry was then evenly coated on carbon paper and dried immediately. After that, the carbon paper was punched into several disks (diameter: 14 mm, load: 2 mg) as the working electrodes and counter electrodes. The electrodes were assembled into a CR2032 coin cell with 60  $\mu$ L of DOL/DME electrolyte containing Li<sub>2</sub>S<sub>6</sub> (0.1 M) and LITFSI (1M). CV curves were carried out to access the performance of symmetric cells. The scan velocity was 50 mV s<sup>-1</sup> between -1 V to 1 V.

## 2. Supporting Figures

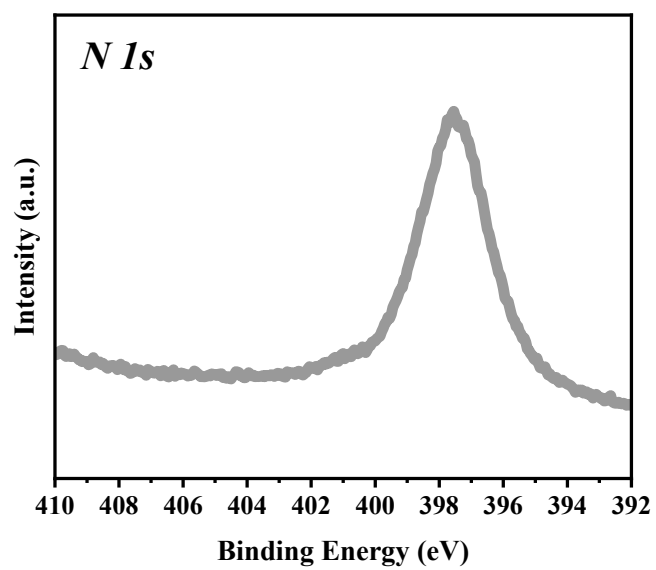

**Fig. S1.** High-resolution XPS spectrum of N 1s

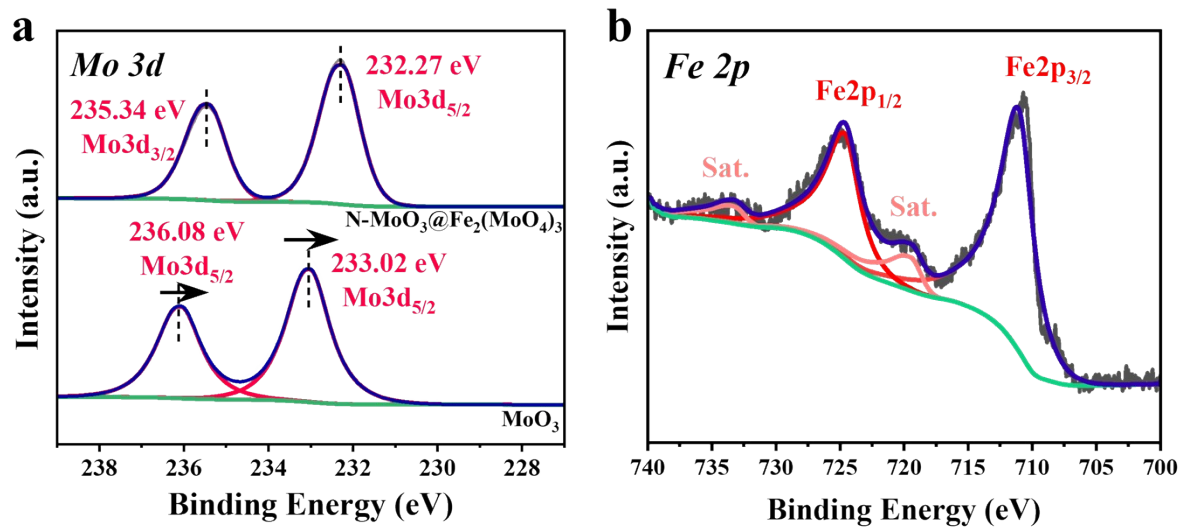

**Fig. S2.** High-resolution XPS spectra of (a) Mo 3d of N- $\text{MoO}_3@Fe_2(\text{MoO}_4)_3$  and  $\text{MoO}_3$  and (b) Fe 2p of  $\text{MoO}_3$ .

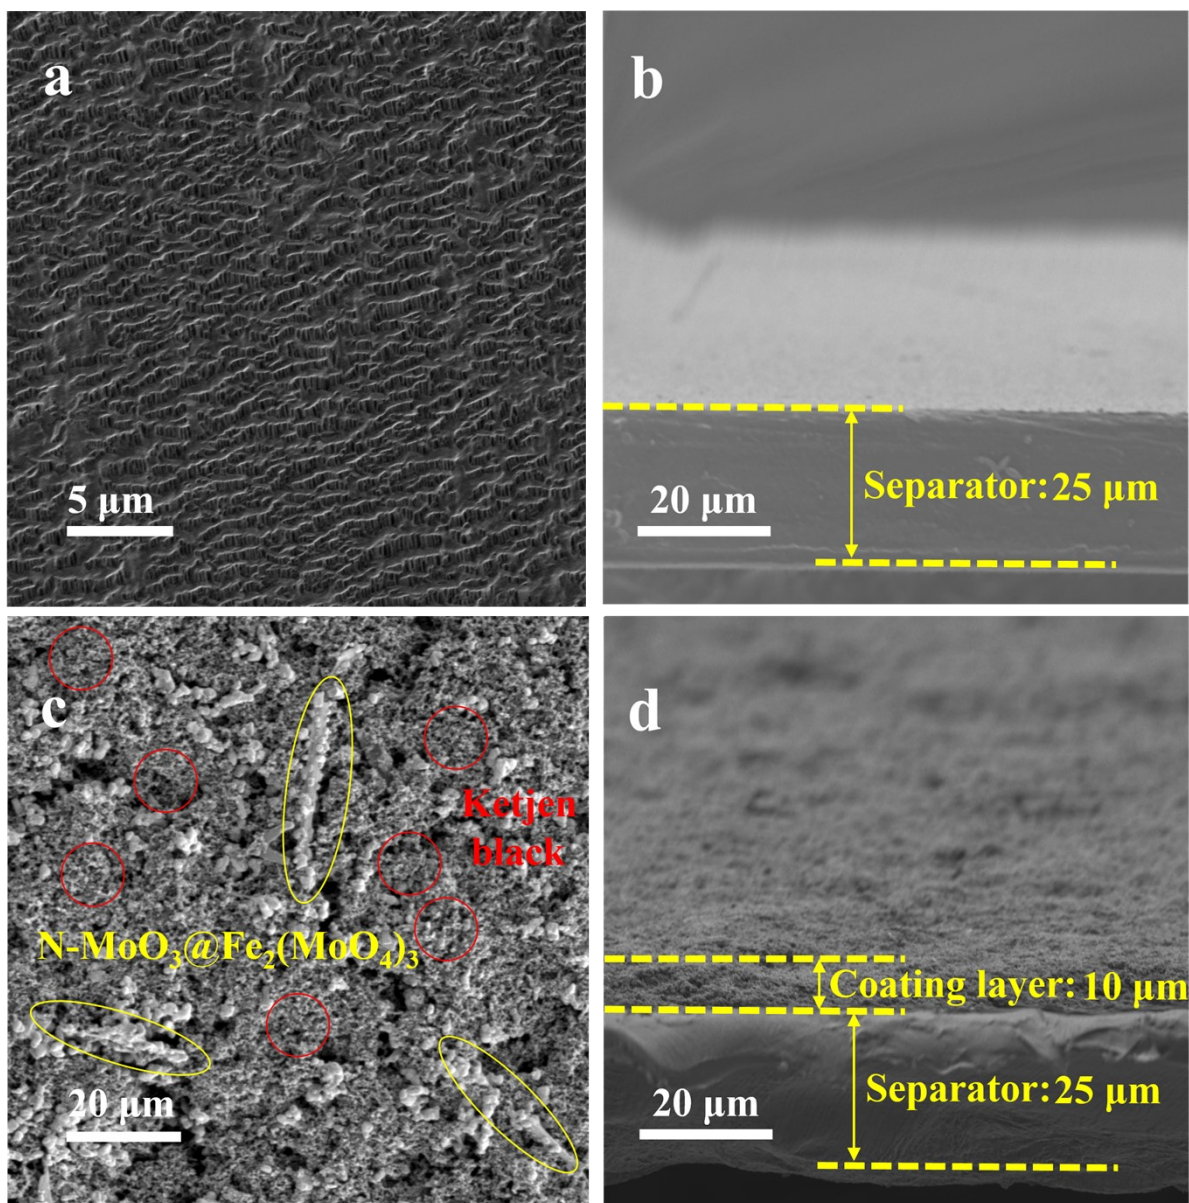

**Fig. S3.** Horizontal plane (a, c) and cross-sectional (b, d) SEM images of the N-MoO<sub>3</sub>@Fe<sub>2</sub>(MoO<sub>4</sub>)<sub>3</sub>/PP and PP separator.

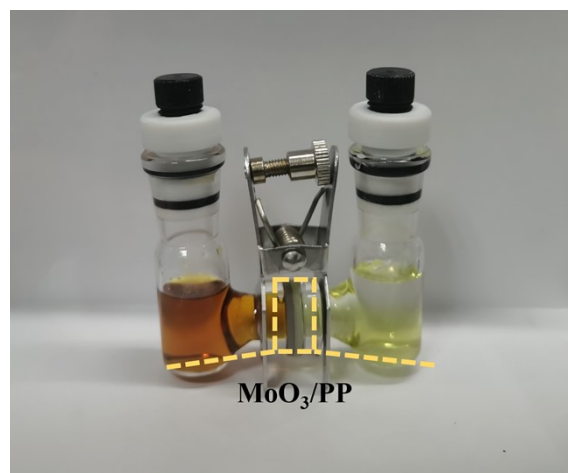

**Fig. S4.** Li<sub>2</sub>S<sub>6</sub> permeation experiment of H-shaped glass tubes with MoO<sub>3</sub>/PP.



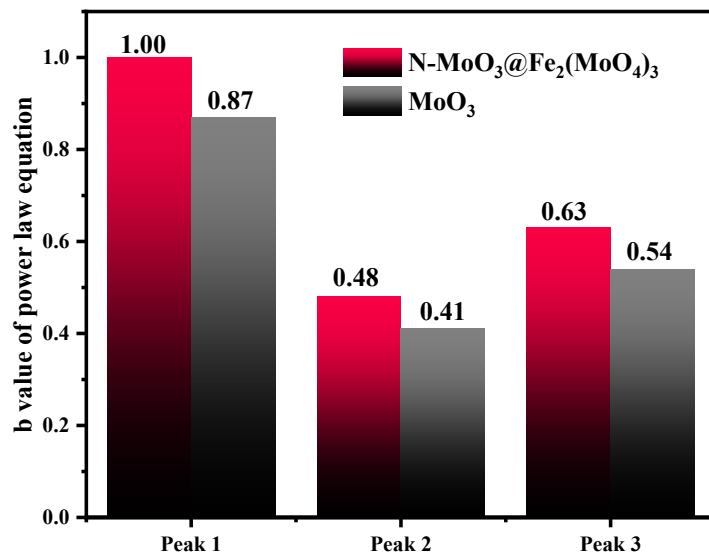

Fig. S5. B value of the power-law equation in peak1-3.

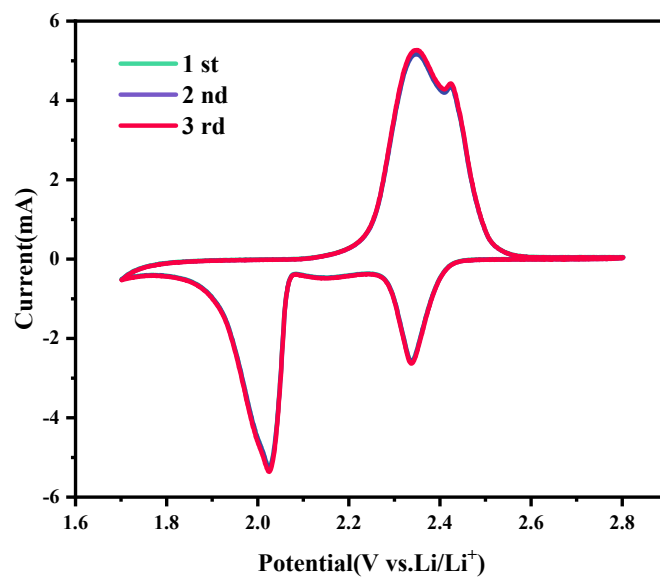

**Fig. S6.** The first three cycles of CV curves of cells with N-MoO<sub>3</sub>@Fe<sub>2</sub>(MoO<sub>4</sub>)<sub>3</sub>/PP.

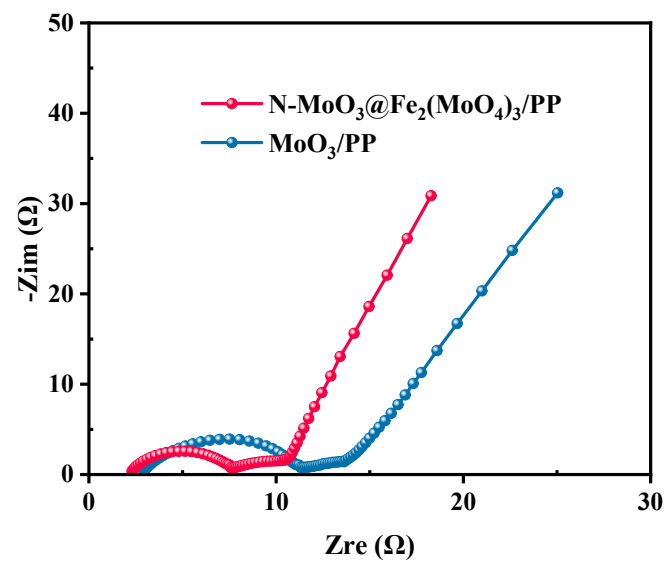

**Fig. S7.** EIS spectra of cells with different separators after 0.5C for 100 cycles.

**Table S1.** Comparison of the electrochemical performance of N-MoO<sub>3</sub>@Fe<sub>2</sub>(MoO<sub>4</sub>)<sub>3</sub> with other reported separator coating materials.

| Cathode          | sulfur loading<br>(mg cm <sup>-2</sup> ) | Coating material                                                     | Initial capacity<br>(mAh g <sup>-1</sup> ) | Capacity fading rate<br>(per cycle) | year | Refs      |
|------------------|------------------------------------------|----------------------------------------------------------------------|--------------------------------------------|-------------------------------------|------|-----------|
| Pure sulfur      | 1.2                                      | N-MoO <sub>3</sub> @Fe <sub>2</sub> (MoO <sub>4</sub> ) <sub>3</sub> | 1601 (0.1C)                                | 0.05% (600r-1C)                     | 2022 | This work |
| Pure sulfur      | 0.8-1.0                                  | Zn, N-doped carbon<br>nanofiber                                      | 1263 (0.2C)                                | 0.07%(500r-1C)                      | 2022 | 1         |
| Pure sulfur      | 0.7                                      | TiN@C                                                                | 1490 (0.1C)                                | 0.05% (600r-1C)                     | 2021 | 2         |
| Pure sulfur      | 1.2-1.4                                  | Li-MOF/RGO                                                           | ~1600 (0.1C)                               | 0.09% (600r-1C)                     | 2021 | 3         |
| Pure sulfur      | 1.1-1.4                                  | P-CoS <sub>2</sub> /CNT                                              | 1643 (0.1C)                                | 0.06% (500r-1C)                     | 2021 | 4         |
| Sulfur composite | 1.0-1.2                                  | Ni/SiO <sub>2</sub> /G                                               | 1456 (0.1C)                                | 0.09% (300r-1C)                     | 2020 | 5         |
| Pure sulfur      | 1.2                                      | NiS <sub>2</sub> @rGO/CNTs-Li                                        | 1515 (0.2C)                                | 0.07% (600r-2C)                     | 2020 | 6         |
| Sulfur composite | 1.2                                      | Oxi-d-Mxene900                                                       | ~1600 (0.2C)                               | 0.14% (300r-1C)                     | 2020 | 7         |
| Pure sulfur      | 1.0                                      | P-doped BN/graphene                                                  | ~1500 (0.1C)                               | 0.06% (500r-1C)                     | 2019 | 8         |
| Pure sulfur      | 1.2                                      | PPy                                                                  | 1271 (0.1C)                                | 0.08% (250r-0.5C)                   | 2019 | 9         |
| Pure sulfur      | 1.0                                      | ZBCP                                                                 | 1407 (0.1C)                                | 0.05% (200r-0.25C)                  | 2018 | 10        |
| Pure sulfur      | 1.2                                      | MoS <sub>2</sub> /Polymer                                            | ~1450 (0.1C)                               | 0.05% (600r-1C)                     | 2018 | 11        |

## Supplementary References

1. X. Fang, P. Cheng, K. Sun, Y. Fu, D. Liu and D. He, *ACS Applied Energy Materials*, 2022, **5**, 8189-8197.
2. Y. Fan, K. Liu, A. Ali, X. Chen and P. K. Shen, *Electrochim Acta*, 2021, **384**.
3. M. Zhou, Y. Li, T. Lei, W. Chen, G. Rao, L. Xue, A. Hu, Y. Fan, J. Huang, Y. Hu, X. Wang and J. Xiong, *Small*, 2021, **17**, e2104367.
4. J. Liu, Z. Qiao, Q. Xie, D. L. Peng and R. J. Xie, *ACS Appl Mater Interfaces*, 2021, **13**, 15226-15236.
5. C. Chen, Q. B. Jiang, H. F. Xu, Y. P. Zhang, B. K. Zhang, Z. Y. Zhang, Z. Lin and S. Q. Zhang, *Nano Energy*, 2020, **76**.
6. J. Wang, J. Xu, W. Q. Tang, D. F. Niu, S. L. Zhao, S. Z. Hu and X. S. Zhang, *Chemnanomat*, 2020, **6**, 976-983.
7. D. K. Lee, Y. Chae, H. Yun, C. W. Ahn and J. W. Lee, *ACS Nano*, 2020, **14**, 9744-9754.
8. J. Zhang, W. Ma, Z. Feng, F. Wu, D. Wei, B. Xi and S. Xiong, *Journal of Energy Chemistry*, 2019, **39**, 54-60.
9. Y. J. Li, W. Y. Wang, X. X. Liu, E. Y. Mao, M. T. Wang, G. C. Li, L. Fu, Z. Li, A. Y. S. Eng, Z. W. Seh and Y. M. Sun, *Energy Stor Mater*, 2019, **23**, 261-268.
10. J. K. Huang, M. Li, Y. Wan, S. Dey, M. Ostwal, D. Zhang, C. W. Yang, C. J. Su, U. S. Jeng, J. Ming, A. Amassian, Z. Lai, Y. Han, S. Li and L. J. Li, *ACS Nano*, 2018, **12**, 836-843.
11. J. Y. Wu, H. X. Zeng, X. W. Li, X. Xiang, Y. G. Liao, Z. G. Xue, Y. S. Ye and X. L. Xie, *Adv Energy Mater*, 2018, **8**.
